# Supplementary material for: Risk of Secondary Household Transmission of COVID-19 from Health Care Workers in a Hospital in Spain
Source: MDPI journal article supplement (doi:10.3390/epidemiologia3010001), 2021-12-27
Supplement: s1 [file s1]

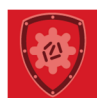

## Article

# Risk of Secondary Household Transmission of COVID-19 from Health Care Workers in a Hospital in Spain

Miren Remón-Berrade, Sara Guillen-Aguinaga, Isabel Sarrate-Adot, Maria Pilar Garcia-Garcia, Maria del Carmen Lerga-Berrueto, Laura Guillen-Aguinaga and Francisco Guillen-Grima

**Table S1.** Distribution of families and secondary cases.

| Number of families | Accumulated % of families | Number secondary cases | Accumulated % of secondary cases |
|--------------------|---------------------------|------------------------|----------------------------------|
| 1                  | 1.12%                     | 8                      | 9.41%                            |
| 2                  | 2.25%                     | 6                      | 16.47%                           |
| 3                  | 3.37%                     | 4                      | 21.18%                           |
| 4                  | 4.49%                     | 4                      | 25.88%                           |
| 5                  | 5.62%                     | 4                      | 30.59%                           |
| 6                  | 6.74%                     | 4                      | 35.29%                           |
| 7                  | 7.87%                     | 4                      | 40.00%                           |
| 8                  | 8.99%                     | 3                      | 43.53%                           |
| 9                  | 10.11%                    | 3                      | 47.06%                           |
| 10                 | 11.24%                    | 3                      | 50.59%                           |
| 11                 | 12.36%                    | 3                      | 54.12%                           |
| 12                 | 13.48%                    | 3                      | 57.65%                           |
| 13                 | 14.61%                    | 2                      | 60.00%                           |
| 14                 | 15.73%                    | 2                      | 62.35%                           |
| 15                 | 16.85%                    | 2                      | 64.71%                           |
| 16                 | 17.98%                    | 2                      | 67.06%                           |
| 17                 | 19.10%                    | 2                      | 69.41%                           |
| 18                 | 20.22%                    | 2                      | 71.76%                           |
| 19                 | 21.35%                    | 2                      | 74.12%                           |
| 20                 | 22.47%                    | 2                      | 76.47%                           |
| 21                 | 23.60%                    | 2                      | 78.82%                           |
| 22                 | 24.72%                    | 1                      | 80.00%                           |
| 23                 | 25.84%                    | 1                      | 81.18%                           |
| 24                 | 26.97%                    | 1                      | 82.35%                           |
| 25                 | 28.09%                    | 1                      | 83.53%                           |
| 26                 | 29.21%                    | 1                      | 84.71%                           |
| 27                 | 30.34%                    | 1                      | 85.88%                           |
| 28                 | 31.46%                    | 1                      | 87.06%                           |
| 29                 | 32.58%                    | 1                      | 88.24%                           |
| 30                 | 33.71%                    | 1                      | 89.41%                           |
| 31                 | 34.83%                    | 1                      | 90.59%                           |
| 32                 | 35.96%                    | 1                      | 91.76%                           |
| 33                 | 37.08%                    | 1                      | 92.94%                           |
| 34                 | 38.20%                    | 1                      | 94.12%                           |
| 35                 | 39.33%                    | 1                      | 95.29%                           |
| 36                 | 40.45%                    | 1                      | 96.47%                           |
| 37                 | 41.57%                    | 1                      | 97.65%                           |
| 38                 | 42.70%                    | 1                      | 98.82%                           |
| 39                 | 43.82%                    | 1                      | 100.00%                          |
| 40                 | 44.94%                    | 0                      | 100.00%                          |
| (...)              | (...)                     | (...)                  | (...)                            |
| 89                 | 100.00%                   | 0                      | 100.00%                          |
